# Supplementary material
Source: HighWire-hosted journal article supplement (https://ajnr-sso.highwirestaging.com/highwire/filestream/106826/field_highwire_adjunct_files/0/0886.pdf)
Supplement: 0886.pdf [file 0886.pdf]

**Online Supplemental Material**

**for**

***Mechanical thrombectomy for pediatric arterial ischemic  
stroke from acute M2 occlusion***

**Supplementary Table 1: Pediatric patients with MCA-M2 segment occlusion treated with mechanical thrombectomy**

| Patient number | Sex (F/M) | Age (years) | Side of brain | IV tPA given | Clinical presentation  | Stroke etiology     | Hospital arrival time (hours since LSW) <sup>a</sup> | Timing of initial angiographic imaging (minutes since LSW) <sup>a</sup> | ASPECTS score on baseline CT or MRI | Successful thrombectomy technique utilized | Final mTICI score | Ped-NIHSS score pre | Ped-NIHSS score 24h post | Ped-mRS 3m post stroke | Ped-mRS final available | Ped-mRS timing of final score (months post) |
|----------------|-----------|-------------|---------------|--------------|------------------------|---------------------|------------------------------------------------------|-------------------------------------------------------------------------|-------------------------------------|--------------------------------------------|-------------------|---------------------|--------------------------|------------------------|-------------------------|---------------------------------------------|
| 1              | M         | 16          | R             | No           | Hemiparesis            | Cardio-embolic      | < 6 hours                                            | 154                                                                     | 9                                   | Stent-retriever alone                      | 3                 | 13                  | 3                        | 1                      | 0                       | 12                                          |
| 2              | M         | 14          | L             | No           | Dysphasia              | Paradoxical embolus | < 6 hours                                            | 161                                                                     | 8                                   | Stent-retriever + aspiration               | 2b                | 6                   | 0                        | 0                      | 0                       | 48                                          |
| 3              | M         | 3           | R             | No           | Hemiparesis            | Cardio-embolic      | < 6 hours                                            | 310                                                                     | 8                                   | Stent-retriever + aspiration               | 3                 | 3                   | 0                        | 0                      | 0                       | 12                                          |
| 4              | M         | 0.9         | R             | No           | Hemiparesis            | Paradoxical embolus | < 6 hours                                            | 495                                                                     | 8                                   | Stent-retriever alone                      | 2b                | 8 <sup>b</sup>      | 2 <sup>b</sup>           | 1                      | 1                       | 6                                           |
| 5              | M         | 6           | L             | Yes          | Hemiparesis, dysphasia | Paradoxical embolus | < 6 hours                                            | 139                                                                     | 9                                   | Stent-retriever + aspiration               | 2b                | 9                   | 3                        | 1                      | 1                       | 3                                           |
| 6              | F         | 15          | R             | Yes          | Hemiparesis            | Cardio-embolic      | < 6 hours                                            | 60                                                                      | 10                                  | Aspiration alone                           | 2b                | 12                  | 2                        | 1                      | 1                       | 3                                           |

<sup>a</sup> One thrombectomy patient and two control patients suffered their stroke episodes whilst being hospital inpatients.

<sup>b</sup> This patient was 11 months of age at the time of treatment. The Ped-NIHSS is designed and validated for children > 2 years of age and several of the testing domains cannot be accurately assessed in an infant. The scores provided are based on the observational examination findings within the testable domains and therefore may be an underestimate of the true extent of disability.

ABBREVIATIONS: ASPECTS – Alberta Stroke Program Early CT Score, F – female, IV – intravenous, L – Left, LSW – last seen well, M – male, MCA-M2 – 2<sup>nd</sup> segment of the middle cerebral artery, mTICI – modified Treatment In Cerebral Ischemia scale, N/A – not applicable, NR – not recorded, Ped-mRS – Pediatric modified Rankin Scale score, Ped-NIHSS – Pediatric National Institute of Health Stroke Scale score, R – right, tPA – tissue plasminogen activator (thrombolysis)

**Supplementary Table 2: Summary results comparing pediatric patients with MCA-M2 occlusion treated by mechanical thrombectomy**

|                                                                                               | Thrombectomy patients |
|-----------------------------------------------------------------------------------------------|-----------------------|
| <b>Number of patients (n)</b>                                                                 | 6                     |
| <b>Sex</b>                                                                                    |                       |
| Female                                                                                        | 1                     |
| Male                                                                                          | 5                     |
| <b>Age (years)</b>                                                                            |                       |
| Mean, $\mu$ (SD)                                                                              | 9.2 (6.60)            |
| Range                                                                                         | 0.9 - 16              |
| <b>Administered IV thrombolysis (n)</b>                                                       | 2                     |
| <b>Hemisphere involved</b>                                                                    |                       |
| Left                                                                                          | 2                     |
| Right                                                                                         | 4                     |
| <b>Initial hospital arrival timing (mins since LSW)<sup>a</sup></b>                           |                       |
| Mean, $\mu$ (SD)                                                                              | 109.2 (97.6)          |
| Range                                                                                         | 35 - 274              |
| <b>Timing of initial angiographic imaging (CTA, MRA, or DSA) (mins since LSW)<sup>a</sup></b> |                       |
| Mean, $\mu$ (SD)                                                                              | 219.8 (157.3)         |
| Range                                                                                         | 60 - 495              |
| <b>Baseline ASPECTS</b>                                                                       |                       |
| Mean, $\mu$ (SD)                                                                              | 8.7 (0.82)            |
| Range                                                                                         | 8 - 10                |
| <b>Ped-mRS score at 3 months</b>                                                              |                       |
| 0                                                                                             | 2                     |
| 1                                                                                             | 4                     |
| 2                                                                                             | 0                     |
| 3                                                                                             | 0                     |
| 4                                                                                             | 0                     |
| 5                                                                                             | 0                     |
| 6                                                                                             | 0                     |
| 0 – 1 (Non-disabled)                                                                          | 6                     |
| 2 – 6 (Mild to severe disability or death)                                                    | 0                     |
| <b>Ped-mRS score – final available</b>                                                        |                       |
| 0                                                                                             | 3                     |
| 1                                                                                             | 3                     |
| 2                                                                                             | 0                     |
| 3                                                                                             | 0                     |
| 4                                                                                             | 0                     |
| 5                                                                                             | 0                     |
| 6                                                                                             | 0                     |
| 0 – 1 (Non-disabled)                                                                          | 6                     |
| 2 – 6 (Mild to severe disability or death)                                                    | 0                     |
| <b>Timing of final ped-mRS assessment (months post)</b>                                       |                       |
| Mean, $\mu$ (SD)                                                                              | 14.0 (17.15)          |
| Range                                                                                         | 3 - 48                |

<sup>a</sup> One thrombectomy patient suffered their stroke episode whilst being a hospital inpatient.

ABBREVIATIONS: ASPECTS – Alberta Stroke Program Early CT Score, IV – intravenous, LSW – last seen well, MCA-M2 – 2<sup>nd</sup> segment of the middle cerebral artery, mTICI – modified Treatment In Cerebral Ischemia scale, N/A – not applicable, Ped-mRS – Pediatric modified Rankin Scale score, tPA – tissue plasminogen activator (thrombolysis)
